# Supplementary material
Source: publisher figshare collection journal article supplement (https://frontiersin.figshare.com/ndownloader/files/21815577)

## Supplementary Data:

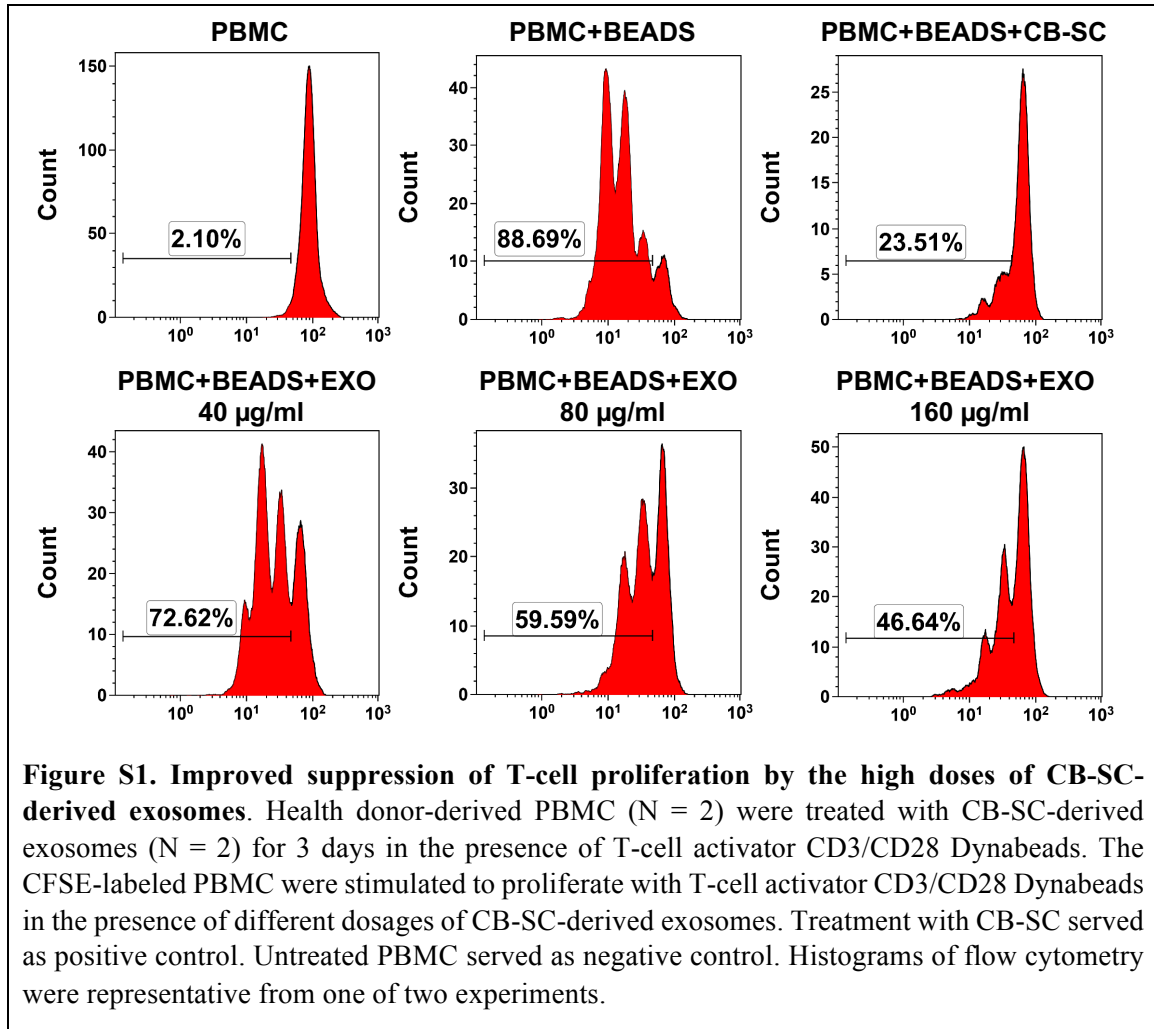

Supplement: Supplementary file [file 21815577]
